# Supplementary material for: Humidity transforms immobile surface charges into mobile charges during triboelectric charging
Source: Royal Society of Chemistry journal article supplement (doi:10.1039/c9cp02398d), 2019-01-01
Supplement: c9cp02398d1.pdf [file c9cp02398d1.pdf]

Supplemental Information

SI 1. Chemical structure and the DFT energies of fragments.

| Fragment Name                                        | Input Chemical Structure                                                             | UB3LYP/6-31G(d,p)<br>Energy (eV) |
|------------------------------------------------------|--------------------------------------------------------------------------------------|----------------------------------|
|                                                      | Optimized Geometry                                                                   |                                  |
| <b>Polyethylene<br/>Mechano-radical</b>              | 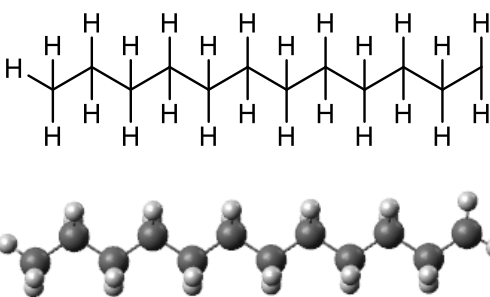   | -12852.8                         |
| <b>Polyethylene<br/>Mechano-anion</b>                |   | -12851.7                         |
| <b>Polyethylene<br/>Mechano-cation</b>               |  | -12846.2                         |
| <b>Polyethylene<br/>Protonated<br/>Mechano-anion</b> |  | -12871.1                         |

|                                                                              |                                                                                      |                 |
|------------------------------------------------------------------------------|--------------------------------------------------------------------------------------|-----------------|
| <p><b>Polyethylene</b><br/><b>Hydroxylated</b><br/><b>Mechano-cation</b></p> | 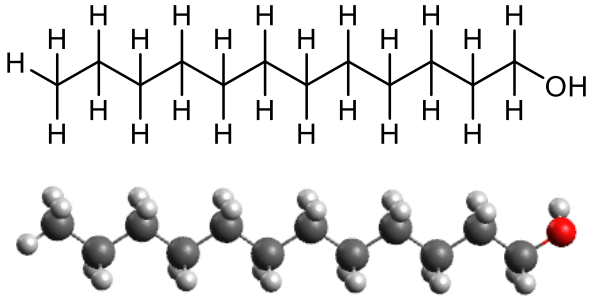   | <p>-14917.6</p> |
| <p><b>Polytetrafluoroethylene</b><br/><b>Mechano-radical</b></p>             |    | <p>-80358.8</p> |
| <p><b>Polytetrafluoroethylene</b><br/><b>Mechano-anion</b></p>               |   | <p>-80360.0</p> |
| <p><b>Polytetrafluoroethylene</b><br/><b>Mechano-cation</b></p>              |  | <p>-80349.8</p> |

|                                                                                           |                                                                                     |                 |
|-------------------------------------------------------------------------------------------|-------------------------------------------------------------------------------------|-----------------|
| <p><b>Polytetrafluoroethylene</b><br/> <b>Protonated</b><br/> <b>Mechano-anion</b></p>    | 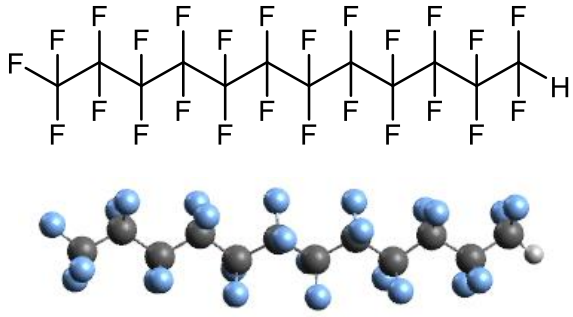  | <p>-80377.0</p> |
| <p><b>Polytetrafluoroethylene</b><br/> <b>Hydroxylated</b><br/> <b>Mechano-cation</b></p> |   | <p>-82424.2</p> |
| <p><b>Polydimethylsiloxane</b><br/> <b>Si-terminated</b><br/> <b>Mechano-radical</b></p>  |   | <p>-35336.3</p> |
| <p><b>Polydimethylsiloxane</b><br/> <b>O-terminated</b><br/> <b>Mechano-anion</b></p>     |  | <p>-37386.8</p> |

|                                                                                                                                                        |                                                                                    |                 |
|--------------------------------------------------------------------------------------------------------------------------------------------------------|------------------------------------------------------------------------------------|-----------------|
| <p><b>Polydimethylsiloxane</b><br/><b>Si-terminated</b><br/><b>Mechano-cation</b></p>                                                                  | 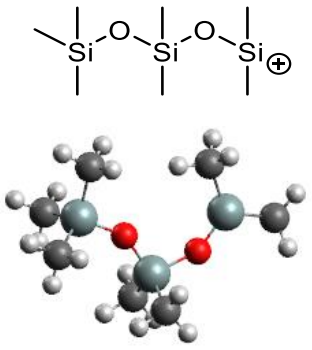  | <p>-35330.7</p> |
| <p><b>Polydimethylsiloxane</b><br/><b>Protonated</b><br/><b>Mechano-anion</b><br/><b>same as</b><br/><b>Hydroxylated</b><br/><b>Mechano-cation</b></p> |  | <p>-37402.6</p> |

## SI 2. Chemical Structure and DFT energies of water clusters and ions.

| Water Chemical Structure        | Optimized Geometry                                                                  | UB3LYP/6-31G(d,p)<br>Energy (eV) |
|---------------------------------|-------------------------------------------------------------------------------------|----------------------------------|
| [H <sub>2</sub> O] <sub>1</sub> |  | -2079.5                          |
| H <sup>+</sup>                  |  | 0                                |
| OH <sup>-</sup>                 |  | -2060.6                          |

|                                     |                                                                                     |          |
|-------------------------------------|-------------------------------------------------------------------------------------|----------|
| $[\text{H}_2\text{O}]_3$            |    | -6239.3  |
| $[\text{H}_2\text{O}]_2\text{H}^+$  |    | -4168.6  |
| $[\text{H}_2\text{O}]_2\text{OH}^-$ |    | -6223.0  |
| $[\text{H}_2\text{O}]_5$            |   | -10399.8 |
| $[\text{H}_2\text{O}]_4\text{H}^+$  |  | -8329.7  |
| $[\text{H}_2\text{O}]_4\text{OH}^-$ |  | -10384.3 |

|                            |                                                                                   |          |
|----------------------------|-----------------------------------------------------------------------------------|----------|
| $[\text{H}_2\text{O}]_5^+$ | 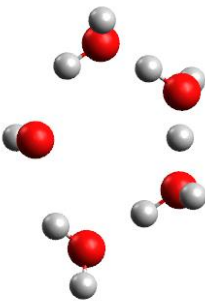 | -10390.7 |
| $[\text{H}_2\text{O}]_5^-$ |  | -10397.7 |
